# Supplementary material
Source: Springer Nature journal article supplement (https://www.springermedizin.de/resource/supplementary/12875_2013_929_MOESM1_ESM.pdf/9435446)
Supplement: MOESM1 [file 9435446]

## Additional file

### Additional file 1 – Items and results

|                                                               | Round 1    |             |         |             |               |             |     |     | Round 2       |            |            |               |   |
|---------------------------------------------------------------|------------|-------------|---------|-------------|---------------|-------------|-----|-----|---------------|------------|------------|---------------|---|
|                                                               | Importance |             |         |             | Changeability |             |     |     | Importance    |            |            | Changeability |   |
|                                                               | A          | I           |         | C           |               | A           | I   | C   | Sum of points | Mdn        | IQR        |               |   |
|                                                               | Mdn        | M           | Mdn     | M           | Mdn           | M           | Mdn | IQR |               |            |            |               |   |
|                                                               | (≥7.64)    | (≥7.70)     | (≥7.76) |             |               |             |     |     |               |            |            |               |   |
| <b>Factors related to the innovation</b>                      |            |             |         |             |               |             |     |     |               |            |            |               |   |
| Evidence-base                                                 | 7          | 6.77        | 7       | 6.23        | 7             | 6.43        | 7   | 4   | -             | -          | -          | -             | - |
| Extent to which intervention is known                         | 8          | 7.20        | 7       | 6.61        | 7             | 6.50        | 7   | 3   | -             | -          | -          | -             | - |
| Sustainability                                                | 8          | <b>8.05</b> | 8       | 7.61        | 8             | <b>8.18</b> | 6   | 4   | 99            | -          | <u>104</u> | 5             | 4 |
| Time investment                                               | 8          | 7.27        | 8       | <b>7.77</b> | 8             | 7.64        | 5   | 5   | -             | 73         | -          | 6             | 2 |
| Financial feasibility for PHC organizations and professionals | 8.5        | <b>8.45</b> | 9       | <b>8.52</b> | 9.5           | <b>8.98</b> | 5   | 5   | <u>186</u>    | <u>141</u> | <u>157</u> | 6             | 2 |
| Intervention's accessibility to the target group              | 8          | <b>7.75</b> | 8       | <b>8.20</b> | 8.5           | <b>8.36</b> | 5   | 4   | <u>158</u>    | <u>123</u> | <u>113</u> | 5             | 3 |
| Delivering intervention is fulltime job                       | 5          | 5.18        | 5       | 5.32        | 6             | 5.61        | 4   | 6   | -             | -          | -          | -             | - |
| Balance between tasks                                         | 7          | 7.00        | 8       | 7.36        | 8             | 7.73        | 5.5 | 5   | -             | -          | -          | -             | - |
| Fit with socio-political context                              | 7          | 6.95        | 7       | 7.27        | 8             | 7.48        | 6   | 5   | -             | -          | -          | -             | - |
| Fit with organizational logistics                             | 7          | 6.66        | 7       | 6.82        | 7             | 7.05        | 6   | 5   | -             | -          | -          | -             | - |
| Fit with PHC organizations' and professionals' objectives     | 8          | <b>7.68</b> | 7       | 7.05        | 7             | 7.16        | 6   | 3   | 82            | -          | -          | 7             | 2 |
| Fit with PHC professionals' knowledge                         | 7          | 7.09        | 8       | 7.43        | 8             | 7.32        | 7   | 4   | -             | -          | -          | -             | - |
| Fit with PHC professionals' routines                          | 7          | 6.66        | 7       | 6.98        | 7             | 7.36        | 6   | 3   | -             | -          | -          | -             | - |
| Relative advantages for socio-political context               | 7          | 6.73        | 7       | 6.55        | 7             | 7.25        | 6   | 4   | -             | -          | -          | -             | - |
| Relative advantages for PHC organizations                     | 7          | 7.16        | 7.5     | 6.93        | 7             | 7.14        | 5   | 4   | -             | -          | -          | -             | - |
| Relative advantages for PHC                                   | 8          | 7.30        | 7.5     | 7.07        | 8             | 7.52        | 5   | 4   | -             | -          | -          | -             | - |

|                                                                                |     |             |     |             |     |             |     |   |            |    |    |   |   |
|--------------------------------------------------------------------------------|-----|-------------|-----|-------------|-----|-------------|-----|---|------------|----|----|---|---|
| professionals                                                                  |     |             |     |             |     |             |     |   |            |    |    |   |   |
| Possibility to tailor intervention to participants' needs                      | 8   | 7.34        | 8   | <b>7.86</b> | 8   | 7.70        | 7   | 4 | -          | 80 | -  | 7 | 2 |
| Possibility to tailor to PHC organizations' and professionals' needs           | 8   | 7.41        | 8   | 7.52        | 8   | 7.55        | 6   | 5 | -          | -  | -  | - | - |
| Complexity of organization intervention                                        | 7.5 | 7.36        | 8   | 7.64        | 8   | <b>7.86</b> | 6   | 4 | -          | -  | 87 | 7 | 2 |
| Evidence for intervention effectiveness                                        | 8   | 7.48        | 8   | 7.30        | 8.5 | <b>7.91</b> | 5   | 5 | -          | -  | 35 | 5 | 3 |
| <b>Factors related to the socio-political context</b>                          |     |             |     |             |     |             |     |   |            |    |    |   |   |
| Presence of a public health problem                                            | 8   | <b>8.09</b> | 7   | 6.98        | 7   | 6.68        | 2.5 | 5 | <u>113</u> | -  | -  | 3 | 4 |
| Media attention                                                                | 7.5 | 7.09        | 6.5 | 6.18        | 6   | 5.93        | 5   | 4 | -          | -  | -  | - | - |
| Socio-political medical culture (preventive)                                   | 7   | 6.77        | 7.5 | 7.00        | 7   | 6.80        | 4.5 | 4 | -          | -  | -  | - | - |
| Formal education on PA and interventions                                       | 7   | 7.05        | 7   | 6.75        | 7   | 6.30        | 5   | 5 | -          | -  | -  | - | - |
| Support for intervention from government                                       | 8   | <b>8.14</b> | 8   | <b>7.70</b> | 8   | <b>7.77</b> | 4.5 | 5 | 65         | 22 | 52 | 5 | 3 |
| Support for intervention from insurance companies                              | 9   | <b>8.59</b> | 9   | <b>8.73</b> | 9   | <b>8.66</b> | 5   | 4 | <u>107</u> | 67 | 85 | 6 | 2 |
| Support for intervention from local authorities                                | 8   | 7.61        | 8   | <b>7.84</b> | 8   | <b>8.07</b> | 5   | 4 | -          | 61 | 65 | 6 | 1 |
| Support for intervention from PHC professionals                                | 8   | <b>7.84</b> | 8   | <b>7.75</b> | 8   | <b>8.09</b> | 7   | 3 | 77         | 34 | 27 | 7 | 2 |
| Support for intervention from PHC organizations                                | 8   | 7.45        | 8   | 7.50        | 8   | 7.59        | 6.5 | 4 | -          | -  | -  | - | - |
| Presence of intervention champions within community                            | 8   | <b>8.16</b> | 7.5 | 7.34        | 7   | 7.07        | 6   | 4 | 50         | -  | -  | 6 | 3 |
| Availability of PA or sport facilities within community                        | 6   | 5.91        | 7   | 7.25        | 8   | <b>7.84</b> | 3.5 | 6 | -          | -  | 90 | 7 | 3 |
| Network between intervention developer and external parties                    | 7   | 7.18        | 8   | 7.52        | 8   | <b>7.89</b> | 7   | 4 | -          | -  | 59 | 7 | 2 |
| Network between intervention developer and PHC organizations and professionals | 7   | 7.36        | 7   | 7.41        | 7   | 7.36        | 7   | 3 | -          | -  | -  | - | - |
| Network between intervention                                                   | 7   | 7.00        | 8   | 7.34        | 8   | 7.59        | 6   | 5 | -          | -  | -  | - | - |

|                                                                        |     |             |     |             |   |             |     |   |            |            |            |   |   |  |
|------------------------------------------------------------------------|-----|-------------|-----|-------------|---|-------------|-----|---|------------|------------|------------|---|---|--|
| providers                                                              |     |             |     |             |   |             |     |   |            |            |            |   |   |  |
| Network between PHC and local PA or sport facilities                   | 7   | 6.39        | 8   | 7.36        | 9 | <b>8.00</b> | 6   | 4 | -          | -          | <u>129</u> | 7 | 2 |  |
| Collaboration between intervention developer and intervention partners | 7.5 | 7.34        | 8   | 7.52        | 8 | 7.61        | 7   | 3 | -          | -          | -          | - | - |  |
| Collaboration between different PA interventions                       | 5.5 | 5.52        | 6   | 5.50        | 7 | 6.45        | 6   | 4 | -          | -          | -          | - | - |  |
| Collaboration between intervention providers                           | 7   | 6.57        | 8   | 7.14        | 8 | 7.39        | 6   | 4 | -          | -          | -          | - | - |  |
| Socio-political medical culture (curative)                             | 8   | 7.55        | 8   | 7.25        | 8 | 7.36        | 3.5 | 4 | -          | -          | -          | - | - |  |
| Competition between PA interventions                                   | 6   | 6.09        | 5.5 | 5.61        | 5 | 5.52        | 3   | 3 | -          | -          | -          | - | - |  |
| <b>Factors related to the organization</b>                             |     |             |     |             |   |             |     |   |            |            |            |   |   |  |
| Time to deliver the intervention                                       | 8   | <b>7.86</b> | 8   | <b>8.39</b> | 9 | <b>8.64</b> | 4   | 6 | <u>120</u> | <u>148</u> | <u>92</u>  | 6 | 4 |  |
| Presence of the target group within organization                       | 8   | 7.50        | 8   | <b>7.91</b> | 8 | <b>7.82</b> | 3   | 5 | -          | <u>114</u> | <u>120</u> | 5 | 4 |  |
| Support for intervention from management                               | 8   | <b>7.70</b> | 8   | 7.50        | 8 | 7.57        | 5   | 6 | 82         | -          | -          | 7 | 2 |  |
| Routine of intervention tasks within organization                      | 7   | 6.50        | 8   | 7.36        | 8 | 7.45        | 5   | 4 | -          | -          | -          | - | - |  |
| Support for intervention from professionals within organization        | 8   | <b>7.86</b> | 8   | <b>7.82</b> | 8 | 7.75        | 7   | 4 | <u>164</u> | 56         | -          | 7 | 2 |  |
| Presence of intervention champions within organization                 | 8   | <b>8.00</b> | 7   | 7.30        | 7 | 6.82        | 6   | 5 | <u>162</u> | -          | -          | 6 | 2 |  |
| Collaboration within organization                                      | 7   | 6.98        | 8   | 7.55        | 8 | 7.59        | 6   | 5 | -          | -          | -          | - | - |  |
| Presence of PA or sport facilities within organization                 | 6   | 6.20        | 7   | 6.61        | 7 | 6.45        | 4   | 5 | -          | -          | -          | - | - |  |
| Organizational medical culture (curative)                              | 8   | 7.34        | 7   | 7.00        | 7 | 6.98        | 4   | 5 | -          | -          | -          | - | - |  |
| <b>Factors related to the patient</b>                                  |     |             |     |             |   |             |     |   |            |            |            |   |   |  |
| Participants' feedback                                                 | 8   | 7.18        | 8   | <b>8.07</b> | 9 | <b>8.48</b> | 5   | 5 | -          | <u>105</u> | <u>93</u>  | 7 | 2 |  |
| Relationship between provider and participant                          | 7   | 6.82        | 8   | 7.61        | 8 | <b>7.86</b> | 4.5 | 6 | -          | -          | 66         | 7 | 2 |  |
| Potential participants' enthusiasm                                     | 7   | 7.07        | 8   | <b>7.98</b> | 8 | <b>8.05</b> | 5   | 5 | -          | 53         | 21         | 7 | 3 |  |
| Potential participants have other                                      | 7   | 6.59        | 7   | 6.52        | 7 | 6.66        | 5   | 5 | -          | -          | -          | - | - |  |

|                                                                                       |     |             |     |             |     |             |   |   |            |            |            |   |   |   |
|---------------------------------------------------------------------------------------|-----|-------------|-----|-------------|-----|-------------|---|---|------------|------------|------------|---|---|---|
| aims for consultation                                                                 |     |             |     |             |     |             |   |   |            |            |            |   |   |   |
| Potential participants' medical culture (curative)                                    | 7   | 6.93        | 6.5 | 6.66        | 6.5 | 6.75        | 4 | 5 | -          | -          | -          | - | - | - |
| <b>Factors related to the adopting person</b>                                         |     |             |     |             |     |             |   |   |            |            |            |   |   |   |
| Knowledge                                                                             | 7   | 7.14        | 8   | <b>7.80</b> | 8   | 7.45        | 7 | 2 | -          | <u>82</u>  | -          | 8 | 0 |   |
| Skills                                                                                | 7   | 7.25        | 8   | <b>8.11</b> | 9   | <b>8.05</b> | 7 | 3 | -          | <u>166</u> | 53         | 8 | 1 |   |
| Experience with PA intervention                                                       | 6.5 | 6.00        | 6   | 6.20        | 7   | 6.55        | 4 | 4 | -          | -          | -          | - | - |   |
| Experience with target group                                                          | 7   | 6.64        | 8   | 7.43        | 7   | 7.02        | 4 | 6 | -          | -          | -          | - | - |   |
| Motivation to deliver intervention                                                    | 8   | 7.45        | 8   | <b>8.14</b> | 8   | <b>8.16</b> | 7 | 3 | -          | <u>171</u> | <u>94</u>  | 7 | 2 |   |
| Self-efficacy                                                                         | 7   | 7.14        | 8   | 7.43        | 8   | 7.36        | 6 | 5 | -          | -          | -          | - | - |   |
| Perception that he or she plays an important role in the intervention's effectiveness | 8   | 7.48        | 8   | 7.55        | 8   | 7.68        | 7 | 3 | -          | -          | -          | - | - |   |
| Attitudes towards PA                                                                  | 8   | <b>7.73</b> | 8   | 7.32        | 7.5 | 7.20        | 6 | 5 | <u>158</u> | -          | -          | 7 | 2 |   |
| Attitudes towards the intervention                                                    | 8   | <b>7.70</b> | 8   | <b>7.82</b> | 8   | 7.73        | 7 | 5 | <u>131</u> | 67         | -          | 7 | 2 |   |
| Attitudes towards prevention                                                          | 8   | 7.48        | 7.5 | 7.09        | 8   | 7.14        | 6 | 4 | -          | -          | -          | - | - |   |
| Perception on role or responsibilities with regard to prevention and PA interventions | 8   | 7.43        | 7   | 7.18        | 7   | 7.14        | 6 | 3 | -          | -          | -          | - | - |   |
| Attitudes towards intervention effectiveness                                          | 8   | <b>8.07</b> | 8   | <b>7.95</b> | 9   | <b>8.20</b> | 7 | 2 | 151        | 52         | 56         | 8 | 2 |   |
| Experience with intervention effectiveness                                            | 8   | 7.09        | 8   | <b>8.30</b> | 9   | <b>8.75</b> | 7 | 4 | -          | <u>119</u> | 83         | 6 | 3 |   |
| Priority of intervention delivery                                                     | 7   | 6.80        | 8   | 7.32        | 8   | 7.41        | 4 | 4 | -          | -          | -          | - | - |   |
| Routine of intervention delivery                                                      | 5   | 5.73        | 7   | 6.70        | 7   | 7.09        | 5 | 4 | -          | -          | -          | - | - |   |
| Attitudes towards the target group (motivation)                                       | 7   | 7.00        | 8   | 7.27        | 8   | 7.45        | 5 | 3 | -          | -          | -          | - | - |   |
| Attitudes towards the target group (maintenance of behavior change)                   | 7   | 6.66        | 7   | 7.09        | 8   | 7.30        | 5 | 4 | -          | -          | -          | - | - |   |
| Perception on effect of intervention on relationship with patients                    | 6   | 5.86        | 6   | 6.07        | 6   | 5.98        | 5 | 4 | -          | -          | -          | - | - |   |
| <b>Factors related to the innovation strategy</b>                                     |     |             |     |             |     |             |   |   |            |            |            |   |   |   |
| Introduction success                                                                  | 8   | 7.18        | 8   | <b>7.84</b> | 8   | <b>8.50</b> | 6 | 4 | -          | <u>139</u> | <u>181</u> | 6 | 3 |   |
| Coordination of intervention in one place                                             | 5   | 5.30        | 6   | 5.86        | 6   | 5.80        | 5 | 5 | -          | -          | -          | - | - |   |

|                                                        |     |             |     |             |     |             |     |   |    |    |           |   |   |
|--------------------------------------------------------|-----|-------------|-----|-------------|-----|-------------|-----|---|----|----|-----------|---|---|
| Stakeholder involvement in development of intervention | 8   | 7.52        | 7   | 7.14        | 7   | 7.02        | 6   | 4 | -  | -  | -         | - | - |
| Time to introduce intervention                         | 8   | <b>7.73</b> | 8   | <b>7.89</b> | 8   | 7.32        | 6   | 3 | 70 | 55 | -         | 7 | 2 |
| Clarity on tasks                                       | 8   | 7.48        | 8   | 7.39        | 8   | 6.82        | 6.5 | 4 | -  | -  | -         | - | - |
| Clarity on roles                                       | 8   | 7.34        | 7.5 | 7.34        | 7.5 | 7.07        | 7   | 4 | -  | -  | -         | - | - |
| Materials (participants)                               | 7   | 7.23        | 8   | <b>7.75</b> | 8   | 7.20        | 7   | 4 | -  | 53 | -         | 8 | 2 |
| Materials (providers)                                  | 7.5 | 7.18        | 8   | 7.41        | 8   | 7.20        | 7   | 3 | -  | -  | -         | - | - |
| Availability of list of local PA or sport facilities   | 7   | 6.77        | 8   | 7.45        | 8   | <b>7.93</b> | 6.5 | 4 | -  | -  | <u>94</u> | 8 | 2 |
| Reminders                                              | 6   | 5.55        | 6.5 | 6.11        | 7   | 6.23        | 5.5 | 5 | -  | -  | -         | - | - |
| Refinement                                             | 6   | 5.93        | 7   | 6.80        | 8   | 7.30        | 7   | 4 | -  | -  | -         | - | - |
| Research                                               | 7   | 6.84        | 7   | 6.45        | 7   | 6.95        | 8   | 3 | -  | -  | -         | - | - |
| Assistance                                             | 8   | 7.34        | 8   | 7.48        | 7.5 | 7.18        | 7   | 4 | -  | -  | -         | - | - |
| Training                                               | 8   | 7.57        | 8   | 7.59        | 8   | 7.30        | 8   | 5 | -  | -  | -         | - | - |
| Intervision                                            | 7   | 6.80        | 7   | 7.20        | 8   | 7.30        | 7.5 | 3 | -  | -  | -         | - | - |
| Financial resources for introduction                   | 8   | <b>8.02</b> | 8   | <b>8.39</b> | 9   | <b>8.64</b> | 5   | 5 | 60 | 54 | 79        | 5 | 2 |
| Intervention readiness                                 | 7   | 6.59        | 7   | 6.86        | 8   | 7.27        | 6   | 4 | -  | -  | -         | - | - |

Note. A, adoption; I, implementation; C, continuation; Mdn, median; M, mean; IQR, interquartile range

**Bold** mean scores indicate most important factors for each stage as scored in the first round, which was based on factors' median score ( $\geq 8$ ) and mean score (mean  $\geq 7.64$  for the adoption stage; mean  $\geq 7.70$  for the implementation stage; mean  $\geq 7.76$  for the continuation stage). These factors were included in the second round questionnaire.

Underlined sum of points indicate the top-10 of most important factors for each stage as rated in the second round.
